# Supplementary material
Source: PubMed Central journal article supplement (PMC8142273)
Supplement: mmc1.pdf [file mmc1.pdf]

**Supplemental table 1: Example Case Report Form. Related to step 11-12.**

Example of a case report form for data collection for acute respiratory failure patient cohorts.

|                       |                   |                                        |                      |                              |
|-----------------------|-------------------|----------------------------------------|----------------------|------------------------------|
| <b>Study Number:</b>  | Age:              | Admission Date:                        | Discharge Date:      | Sex:                         |
| Past Medical History: | Clinical Summary: | Date first COVID symptoms:             | List COVID Symptoms: |                              |
|                       |                   | SOFA Score on Admission:               | Date intubation:     | Date Extubated:              |
| CRP Trend:            |                   | PaO2 on admission:                     | FiO2 on admission:   | P/F on admit:                |
| Ferritin Trend:       |                   | PaO2 day 1:                            | FiO2 day 1:          | P/F day 1:                   |
| Procalcitonin Trend:  |                   | PaO2 day 2:                            | FiO2 day 2:          | P/F day 2:                   |
| Interleukin 6 Trend:  |                   | Disease category (mild, prog, severe): |                      | ICU during any point? (y/n): |

**Supplemental table 2: Example dataset comparing CRP values over time to ROX index. Related to step 13-14.**

Example of data set from previous work by Mueller et al, 2020 comparing ROX index to CRP values over time.

| <b>Ref #:</b> | <b>CRP 1</b> | <b>Date + Time CRP 1</b> | <b>CRP 2</b> | <b>Date + Time CRP 2</b> | <b>CRP 3</b> | <b>Date + Time CRP 3</b> | <b>CRP 4</b> | <b>Date + Time CRP 4</b> |
|---------------|--------------|--------------------------|--------------|--------------------------|--------------|--------------------------|--------------|--------------------------|
| <b>1</b>      | 64.4         | 3/26/20<br>2216          | 57.9         | 3/28/20<br>0607          | 113.5        | 3/30/20<br>0438          | 141.3        | 4/1/2020                 |
| <b>2</b>      | 5.3          | 3/24/2020<br>0934        | 11/2         | 3/25/20<br>0554          | 22           | 3/27/20<br>0817          | 69.3         | 3/29/20<br>0450          |

*ROX Index:*

| <b>Ref #:</b> | <b>Day 0</b> |      |                         | <b>Day 1</b> |      |                         | <b>Day 2</b> |      |                         |
|---------------|--------------|------|-------------------------|--------------|------|-------------------------|--------------|------|-------------------------|
|               | SpO2 (%)     | FiO2 | Respiratory rate (/min) | SpO2 (%)     | FiO2 | Respiratory rate (/min) | SpO2 (%)     | FiO2 | Respiratory rate (/min) |
| <b>1</b>      | 100          | 0.36 | 27                      | 97           | 0.28 | 26                      | 91           | 0.28 | 22                      |
| <b>2</b>      | 93           | 0.2  | 22                      | 96           | 0.32 | 16                      | 94           | 0.28 | 18                      |
